# Supplementary material
Source: Royal Society of Chemistry journal article supplement (doi:10.1039/d6gc00285d)
Supplement: d6gc00285d1.pdf [file d6gc00285d1.pdf]

## **Metal-free ionic liquids serve as integrated catalyst-solvent systems for green H<sub>2</sub>S oxidation to sulfur by O<sub>2</sub>**

Mingzhen Shi<sup>[a,b]</sup>, Hongchao Lan<sup>[a]</sup>, Hailong Ning<sup>[a]</sup>, Xiaomin Zhang<sup>[a,c]\*</sup>, Xingbang Hu<sup>[a]</sup>,  
Youting Wu<sup>[a]\*</sup>

[a] State Key Laboratory of Coordination Chemistry, School of Chemistry, Nanjing University, Nanjing 210023, PR China.

[b] Key Laboratory of Synthetic and Natural Functional Molecule of the Ministry of Education, College of Chemistry & Materials Science, Northwest University, Xi'an 710127, PR China.

[c] State Key Laboratory of Coordination Chemistry, Suzhou Key Laboratory of Green Intelligent Manufacturing of New Energy Materials and Devices, the Institute of Green Chemistry and Engineering, Nanjing University, Jiangsu 215163, P.R. China.

\*Corresponding author. Email: [xmzhang@nju.edu.cn](mailto:xmzhang@nju.edu.cn); [ytwu@nju.edu.cn](mailto:ytwu@nju.edu.cn).

## List of Contents:

|                                                                                                                                                                                                                                                                                                                           |    |
|---------------------------------------------------------------------------------------------------------------------------------------------------------------------------------------------------------------------------------------------------------------------------------------------------------------------------|----|
| <b>1. Materials</b> .....                                                                                                                                                                                                                                                                                                 | 3  |
| <b>2. Methods</b> .....                                                                                                                                                                                                                                                                                                   | 3  |
| 2.1 Methodology for Evaluating the Conversion Rate of H <sub>2</sub> S .....                                                                                                                                                                                                                                              | 3  |
| 2.2 Single-component Gas Absorption Measurements .....                                                                                                                                                                                                                                                                    | 4  |
| 2.3 Thermodynamic modeling of H <sub>2</sub> S absorption .....                                                                                                                                                                                                                                                           | 5  |
| <b>3. Figs. S1 to S5.</b> .....                                                                                                                                                                                                                                                                                           | 7  |
| Fig. S1. <sup>1</sup> H and <sup>13</sup> C NMR spectra of N <sub>2222</sub> Ac. ....                                                                                                                                                                                                                                     | 7  |
| Fig. S2. <sup>1</sup> H and <sup>13</sup> C NMR spectra of N <sub>2222</sub> L. ....                                                                                                                                                                                                                                      | 7  |
| Fig. S3. Apparatus for the determination of gas solubility. (GC – gas cylinder; V1, V2, V3 – valves; WB – water bath; GR – gas reservoir; EC – equilibrium cell; TC – thermal controller; MS – magnetic stirrer; VP – vacuum pump; P1, P2 – pressure transducer; NI – numerical instrument; PC – personal computer). .... | 8  |
| Fig. S4. Sulfur precipitation upon completion of H <sub>2</sub> S oxidation in EmimAc. ....                                                                                                                                                                                                                               | 8  |
| Fig. S5. SEM images of sulfur produced by H <sub>2</sub> S oxidation reaction in EmimAc.....                                                                                                                                                                                                                              | 9  |
| Fig. S6. Solubility of H <sub>2</sub> S (A) and O <sub>2</sub> (B) in EmimAc at different temperatures.....                                                                                                                                                                                                               | 9  |
| Fig. S7. Solubility of H <sub>2</sub> S (A) and O <sub>2</sub> (B) in EmimAc containing varying water contents..                                                                                                                                                                                                          | 10 |
| Fig. S8. Viscosity of EmimAc over ten consecutive cycles (25 °C). ....                                                                                                                                                                                                                                                    | 10 |
| <b>4. Tables S1 to S7.</b> .....                                                                                                                                                                                                                                                                                          | 11 |
| Table S1. Names, abbreviations, purities and suppliers of reagents used in this work. ....                                                                                                                                                                                                                                | 11 |
| Table S2. The elemental analysis results of sulfur produced by H <sub>2</sub> S oxidation reaction in EmimAc. ....                                                                                                                                                                                                        | 12 |
| Table S3. Expressions obtained by correlation of solubility data of H <sub>2</sub> S and O <sub>2</sub> in different ILs (x and y represent the pressure of H <sub>2</sub> S and O <sub>2</sub> in bar, respectively) <sup>[a]</sup> .....                                                                                | 13 |
| Table S4. Results of H <sub>2</sub> S oxidation reactions in different ILs <sup>[a]</sup> . ....                                                                                                                                                                                                                          | 14 |
| Table S5. Cartesian coordinates of EmimAc+H <sub>2</sub> S complex from Gaussian 16 program. ...                                                                                                                                                                                                                          | 15 |
| Table S6. Cartesian coordinates of H <sub>2</sub> O+H <sub>2</sub> S complex from Gaussian 16 program.....                                                                                                                                                                                                                | 16 |
| Table S7. Cartesian coordinates of EmimAc+O <sub>2</sub> complex from Gaussian 16 program.....                                                                                                                                                                                                                            | 17 |
| Table S8. Cartesian coordinates of H <sub>2</sub> O+O <sub>2</sub> complex from Gaussian 16 program. ....                                                                                                                                                                                                                 | 18 |
| <b>5. References</b> .....                                                                                                                                                                                                                                                                                                | 19 |

## 1. Materials

H<sub>2</sub>S and O<sub>2</sub> (99.99 mol% purity) were purchased from Nanjing Chuangda Gas Co., Ltd, China. The abbreviations, purity, and suppliers of the reagents used are listed in **Table S1**, and all reagents were used without further purification.

## 2. Methods

### 2.1 Methodology for Evaluating the Conversion Rate of H<sub>2</sub>S

The conversion rate of H<sub>2</sub>S is determined based on the residual gas pressure in the reactor after the reaction, calculated as follows:

Assume that upon completion of the reaction, the total pressure of the residual gas within the reaction vessel is  $P$  (in bar), where the partial pressures of H<sub>2</sub>S and O<sub>2</sub> are  $x$  and  $y$ , respectively:

$$P = x + y \quad (\text{S1})$$

Therefore, the amounts of residual H<sub>2</sub>S and O<sub>2</sub> in the gas phase are:

$$n_{\text{H}_2\text{S}} = \frac{xV_g}{RT} \quad (\text{S2})$$

$$n_{\text{O}_2} = \frac{yV_g}{RT} \quad (\text{S3})$$

In Equations (S2) and (S3),  $V_g$  is the gas-phase volume of the reactor, calculated as the total reactor volume minus the volume of the IL.  $R$  is the ideal gas constant (83.14472 mL·bar/(K·mol)), and  $T$  is the reaction temperature in Kelvin. Assuming the solubility of the reaction products (sulfur and water) in H<sub>2</sub>S and O<sub>2</sub> is negligible, the amounts of H<sub>2</sub>S and O<sub>2</sub> in the liquid phase can be expressed as:

$$n_{\text{H}_2\text{S}} = f_1(x)m_{\text{IL}} \quad (\text{S4})$$

$$n_{\text{O}_2} = f_2(y)m_{\text{IL}} \quad (\text{S5})$$

In Equations (S4) and (S5),  $f_1$  and  $f_2$  represent the functional relationships between the solubility (on a molality basis) of H<sub>2</sub>S and O<sub>2</sub> in ILs and their respective partial pressures, while  $m_{\text{IL}}$  denotes the mass of the IL sample. The solubility measurement method is detailed in **“Section 2.2 Single-component Gas Absorption Measurements”**.

Assuming no side reactions occur, the residual amounts of H<sub>2</sub>S and O<sub>2</sub> in the reactor follow the stoichiometric ratio:

$$n_{\text{H}_2\text{S},g} + n_{\text{H}_2\text{S},l} = 2(n_{\text{O}_2,g} + n_{\text{O}_2,l}) \quad (\text{S6})$$

By combining Equations (S2)–(S6), equation (S7) was obtained:

$$\frac{P_1V}{RT} + f_1(x)m_{IL} = 2 \left[ \frac{P_2V}{RT} + f_2(y)m_{IL} \right] \quad (S7)$$

Subsequently, solving the simultaneous equations (S1) and (S7) yields  $x$  and  $y$ . The H<sub>2</sub>S conversion can then be calculated using Equation (S8):

$$\alpha_{H_2S} = 1 - \frac{n_{H_2S,g} + n_{H_2S,l}}{n_{H_2S,t}} \quad (S8)$$

where  $n_{H_2S,t}$  represents the total amount of H<sub>2</sub>S initially injected (6 mmol).

## 2.2 Single-component Gas Absorption Measurements

As shown in **Fig. S3**, the absorption device consists of two glass chambers. The larger chamber is used as a gas reservoir for storing gas, while the smaller one is used as an equilibrium cell and equipped with a magnetic stirrer, where the gas absorption in ILs takes place. The temperature of the two chambers is controlled by a water bath with an uncertainty of 0.1 °C. The pressures in the two chambers are measured by two pressure sensors, which are connected to a Numerical Instrument to detect the pressure changes on-line.

Take the measurement of H<sub>2</sub>S uptake capacity in ILs as an example. In a typical run, a known mass of IL sample was added to the equilibrium cell and then two chambers were vacuumed. A certain amount of H<sub>2</sub>S gas was fed into the gas reservoir from the gas cylinder, and the pressure of the gas reservoir was recorded as  $P_1$ . Open the valve between the two chambers and put a certain amount of H<sub>2</sub>S gas from the gas cylinder into the equilibrium cell. Equilibrium was achieved when the pressure of the equilibrium cell kept unchanged for 1 h. The pressures of the gas reservoir and equilibrium cell were denoted as  $P_2$  and  $P_3$ , respectively. Then, the gas solubility at an equilibrium pressure of  $P_3$  can be calculated as follows:

$$n_{gas} = \rho_{gas}^{P_1,T} V_1 - \rho_{gas}^{P_2,T} V_2 - \rho_{gas}^{P_3,T} \left( V_2 - \frac{m_{IL}}{\rho_{IL}} \right) \quad (S9)$$

where  $n_{gas}$  is the amount of gas dissolved (mol),  $\rho_{gas}^{P_i,T}$  refers to the gas density at  $P_i$  and  $T$  (mol/L) (data obtained from the NIST Chemistry WebBook <sup>1</sup>),  $V_1$  and  $V_2$  are the volumes of the gas reservoir and equilibrium cell respectively (mL),  $m_{IL}$  is the mass of the sample (g), and  $\rho_{IL}$  is the density of the sample (g/mL). The values of  $V_1$  and  $V_2$  were calibrated using N<sub>2</sub> as the probing gas. The gas solubility at elevated pressures was determined by injecting enhanced amounts of H<sub>2</sub>S gas into the equilibrium cell.

The solubilities of O<sub>2</sub> were tested in the same way as H<sub>2</sub>S.

### 2.3 Thermodynamic modeling of H<sub>2</sub>S absorption

The dissolution behavior of H<sub>2</sub>S in the ILs investigated in this work was modeled using the reaction equilibrium thermodynamic model (RETM), which is proposed based on the Henry's law and reaction equilibrium equation. For the superbase-derived IL [DBUH]Im, a 1:1 complexation mechanism with H<sub>2</sub>S was adopted, and the detailed formulation has been previously reported by our research group <sup>2</sup>. For the remaining ILs, a 2:1 (IL:H<sub>2</sub>S) interaction stoichiometry was employed in the thermodynamic fitting, and the corresponding derivation process is as follows:

The absorption of H<sub>2</sub>S in the investigated IL can be divided into two steps: (1) H<sub>2</sub>S transfer from gas phase to liquid phase; (2) H<sub>2</sub>S react with the IL to form H<sub>2</sub>S-IL complexes. Then the reaction of H<sub>2</sub>S with ILs can be expressed by the following equation:

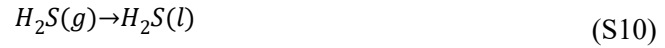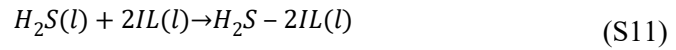

where *g* and *l* in Equations S10 and S11 represent the existing states (gas and liquid, respectively) of a species.

The first step is the physical absorption process, described by Henry's law

$$P = H \cdot m_{H_2S} \quad (S12)$$

where *P* represents the equilibrium pressure of H<sub>2</sub>S in gas phase, *H* is the Henry constant of H<sub>2</sub>S in liquid phase, and *m<sub>H<sub>2</sub>S</sub>* is the molarity of free H<sub>2</sub>S in liquid phase.

The second step is the chemical absorption process, and can be depicted by the reaction equilibrium equation

$$K^\circ = \frac{m_{H_2S - 2IL}}{m_{H_2S} \cdot m_{IL}^2} \quad (S13)$$

where *K<sup>°</sup>* is the reaction equilibrium constant for Equation S11, *m<sub>H<sub>2</sub>S - 2IL</sub>* is the molality of the H<sub>2</sub>S-IL complex in liquid phase, and the *m<sub>IL</sub>* is the molality of free IL in liquid phase.

The overall absorption of H<sub>2</sub>S in the investigated IL can be denoted as follows

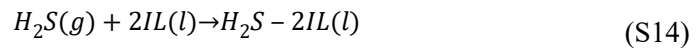

which can be expressed by the reaction equilibrium equation

$$K = \frac{m_{H_2S - 2IL}}{P \cdot m_{IL}^2} \quad (S15)$$

where  $K$  is the reaction equilibrium constant for Equation S14. The material balance equations of  $H_2S$  and IL are shown in Equations S16 and S17, respectively.

$$m_{H_2S}^t = m_{H_2S} + m_{H_2S-2IL} \quad (S16)$$

$$m_{IL}^t = m_{IL} + 2m_{H_2S-2IL} \quad (S17)$$

where  $m_{H_2S}^t$  is the total solubility of  $H_2S$  in  $mol \cdot kg^{-1}$  in the investigated IL, and  $m_{IL}^t$  is the initial molality of IL in  $mol \cdot kg^{-1}$  in the liquid phase.

Combining Equation S12 and Equations S15-17 resulted in Equation S18 after simple derivation

$$m_{H_2S}^t = \frac{4KPm_{IL}^t + 1 - \sqrt{8KPm_{IL}^t + 1}}{8KP} + \frac{P}{H} \quad (S18)$$

Equation S18 was then used for correlating the solubility of  $H_2S$  in the investigated ILs.

The expression obtained by correlating the solubility data of  $H_2S$  in different ILs is shown in **Table S2**. For the solubility of  $O_2$  in these ILs, a linear fitting method was applied, and the resulting fitting expressions are also summarized in **Table S2**.

### 3. Figs. S1 to S5.

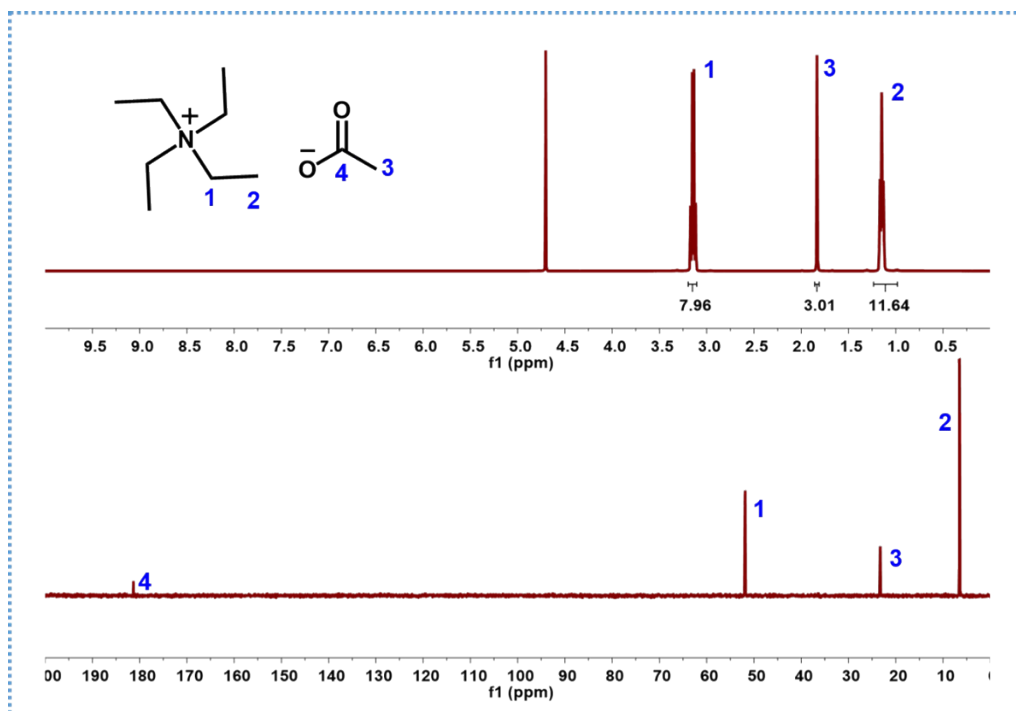

Fig. S1. <sup>1</sup>H and <sup>13</sup>C NMR spectra of N<sub>2222</sub>Ac.

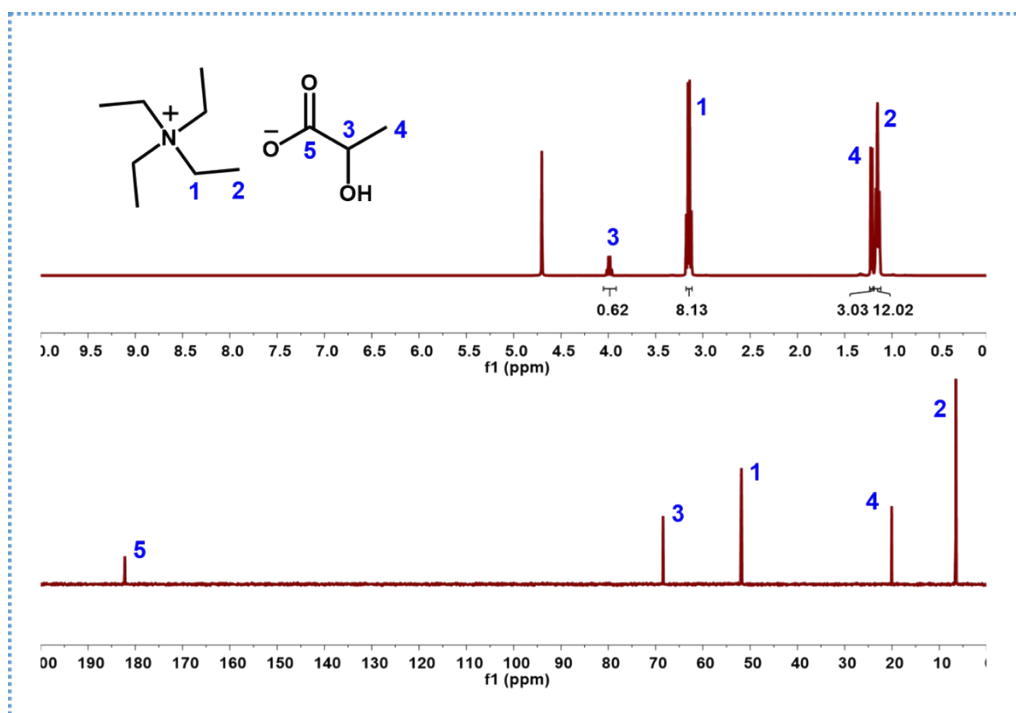

Fig. S2. <sup>1</sup>H and <sup>13</sup>C NMR spectra of N<sub>2222</sub>L.

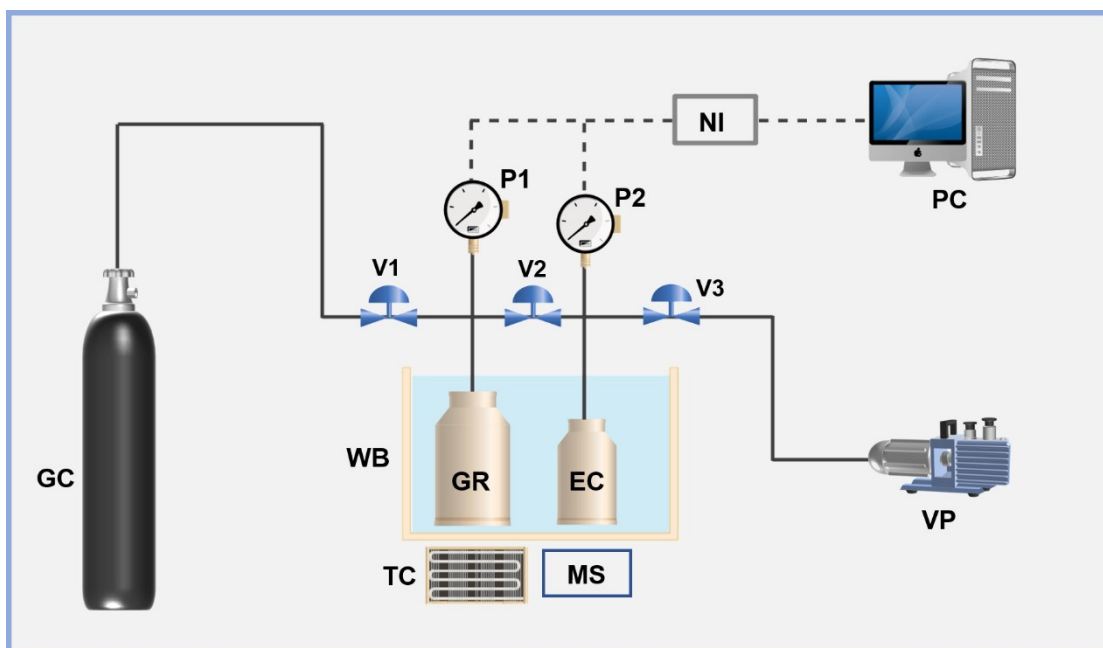

**Fig. S3.** Apparatus for the determination of gas solubility. (GC – gas cylinder; V1, V2, V3 – valves; WB – water bath; GR – gas reservoir; EC – equilibrium cell; TC – thermal controller; MS – magnetic stirrer; VP – vacuum pump; P1, P2 – pressure transducer; NI – numerical instrument; PC – personal computer).

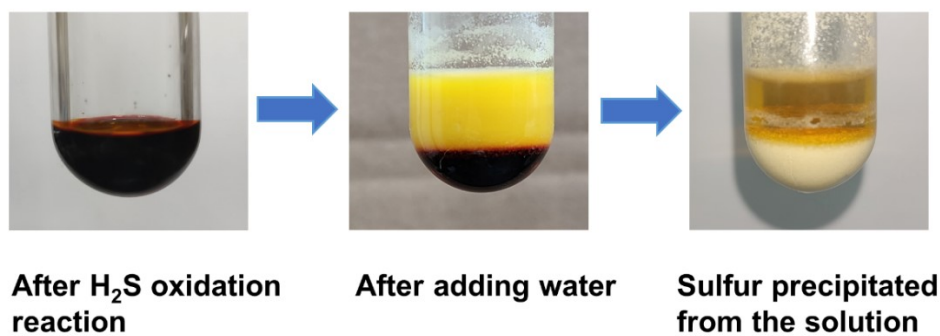

**Fig. S4.** Sulfur precipitation upon completion of  $\text{H}_2\text{S}$  oxidation in EmimAc.

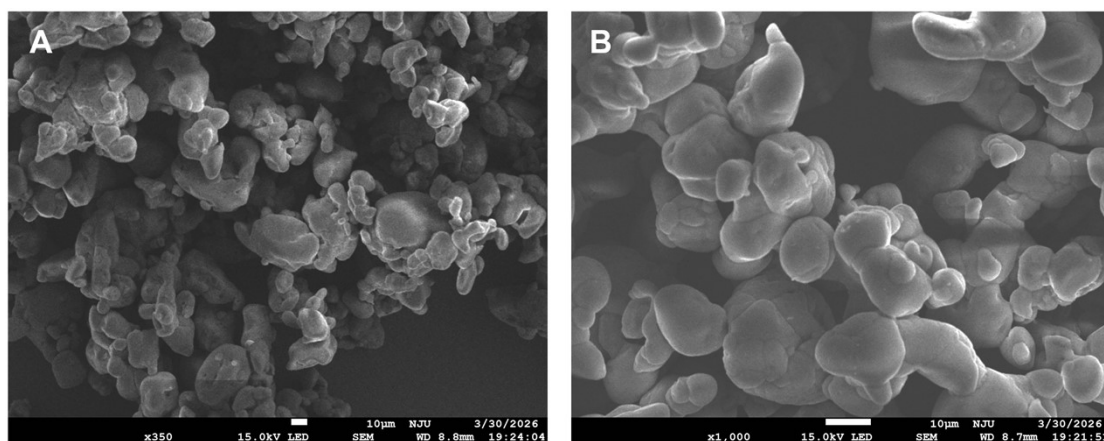

**Fig. S5.** SEM images of sulfur produced by  $\text{H}_2\text{S}$  oxidation reaction in EmimAc.

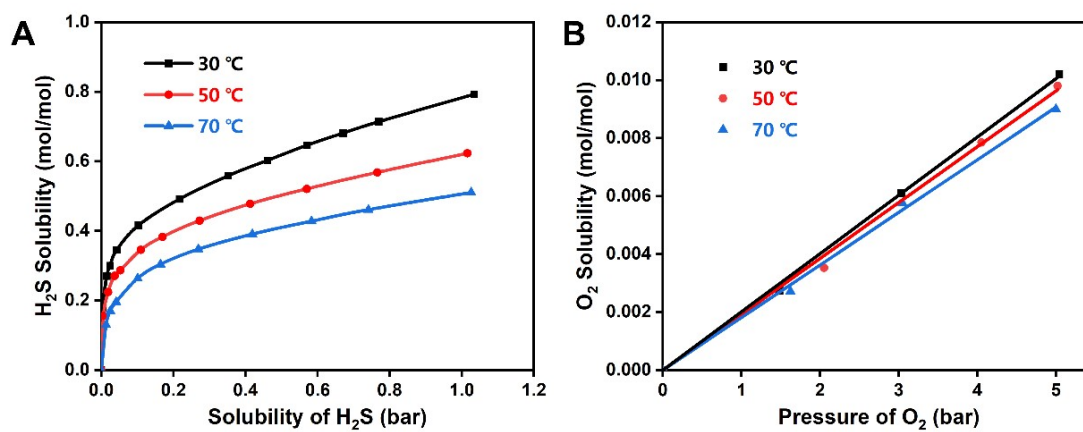

**Fig. S6.** Solubility of  $\text{H}_2\text{S}$  (A) and  $\text{O}_2$  (B) in EmimAc at different temperatures.

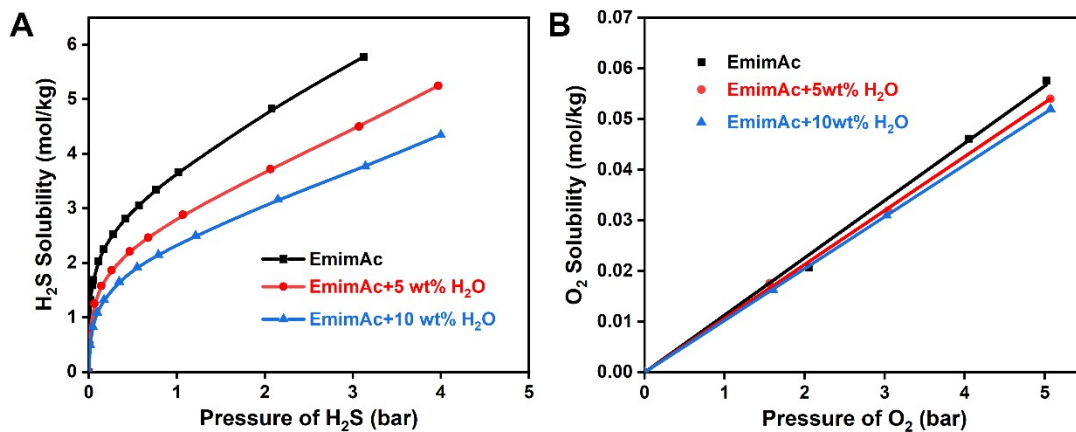

**Fig. S7.** Solubility of H<sub>2</sub>S (A) and O<sub>2</sub> (B) in EmimAc containing varying water contents.

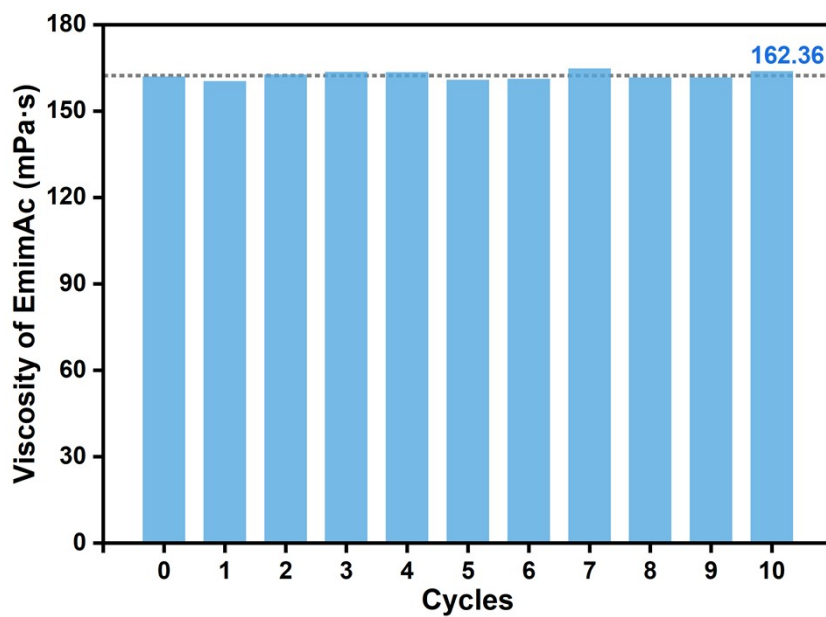

**Fig. S8.** Viscosity of EmimAc over ten consecutive cycles (25 °C).

#### 4. Tables S1 to S7.

**Table S1.** Names, abbreviations, purities and suppliers of reagents used in this work.

| Names                                                          | Abbreviations         | Purities         | Suppliers                                        |
|----------------------------------------------------------------|-----------------------|------------------|--------------------------------------------------|
| 1-Ethyl-3-methylimidazole acetate                              | EmimAc                | 98%              | Shanghai Chengjie Chemical Co., Ltd.             |
| 1-Butyl-3-methylimidazolium acetate                            | BmimAc                | 98%              | Shanghai Chengjie Chemical Co., Ltd.             |
| 1-Hexyl-3-methylimidazolium acetate                            | HmimAc                | 98%              | Shanghai Chengjie Chemical Co., Ltd.             |
| 1-Ethyl-3-methylimidazolium trifluoroacetate                   | EmimTFA               | 98%              | Shanghai Aladdin Reagent Co., Ltd.               |
| 1-Hexyl-3-methylimidazolium chloride                           | HmimCl                | 99%              | Shanghai Titan Technology Co., Ltd.              |
| 1-Hexyl-3-methylimidazolium bis(trifluoromethanesulfonyl)imide | HmimTf <sub>2</sub> N | 98%              | Shanghai Meryer Biochemical Technology Co., Ltd. |
| 1-Hexyl-3-methylimidazolium hexafluorophosphate                | HmimPF <sub>6</sub>   | 99%              | Shanghai Titan Technology Co., Ltd.              |
| 1-Hexyl-3-methylimidazolium tetrafluoroborate                  | HmimBF <sub>4</sub>   | 99%              | Shanghai Titan Technology Co., Ltd.              |
| 1,8-Diazabicyclo[5.4.0]undecane-7-ene                          | DBU                   | 99%              | Shanghai Meryer Biochemical Technology Co., Ltd. |
| Imidazole                                                      | Im                    | 99%              | Shanghai Aladdin Reagent Co., Ltd.               |
| Tetraethylammonium hydroxide                                   | N <sub>2222</sub> OH  | AR, 25% in water | Shanghai Aladdin Reagent Co., Ltd.               |
| Acetic acid                                                    | HAc                   | 99.5%            | Shanghai Aladdin Reagent Co., Ltd.               |
| Lactic acid                                                    | HL                    | AR               | Shanghai Meryer Biochemical Technology Co., Ltd. |
| Ethanol                                                        | -                     | 99.7%            | Shanghai Titan Technology Co., Ltd.              |

**Table S2.** The elemental analysis results of sulfur produced by H<sub>2</sub>S oxidation reaction in EmimAc.

| N (%) | C (%) | H (%) | S (%)  |
|-------|-------|-------|--------|
| 0.088 | 0.675 | 0.194 | 97.281 |

**Table S3.** Expressions obtained by correlation of solubility data of H<sub>2</sub>S and O<sub>2</sub> in different ILs (x and y represent the pressure of H<sub>2</sub>S and O<sub>2</sub> in bar, respectively)

[a].

| Entries | Solvents                       | T(°C) | Solubility of H <sub>2</sub> S                                                             |                 | Expressions for the solubility of O <sub>2</sub> |                     |
|---------|--------------------------------|-------|--------------------------------------------------------------------------------------------|-----------------|--------------------------------------------------|---------------------|
|         |                                |       | Expressions                                                                                | Fitting methods |                                                  |                     |
| 1       | H <sub>2</sub> O               | 50    | 0.05837*x                                                                                  |                 | Linear fitting                                   | 9.406E-04*y         |
| 2       | EmimAc                         | 50    | $(4*4.17896*x*1000/170.21+1-(8*1000/170.21*4.17896*x+1)^{0.5})/(8*4.17896*x)+x/0.91445$    |                 | RETM2:1                                          | 0.01131*y           |
| 3       | BmimAc                         | 50    | $(4*7.64949*x*1000/198.27+1-(8*1000/198.27*7.64949*x+1)^{0.5})/(8*7.64949*x)+x/0.82779$    |                 | RETM2:1                                          | 0.01056*y           |
| 4       | HmimAc                         | 50    | $(4*11.70683*x*1000/226.32+1-(8*1000/226.32*11.70683*x+1)^{0.5})/(8*11.70683*x)+x/0.85291$ |                 | RETM2:1                                          | 0.009798*y          |
| 5       | N <sub>2222</sub> Ac           | 50    | $(4*2.02392*x*1000/189.3+1-(8*1000/189.3*2.02392*x+1)^{0.5})/(8*2.02392*x)+x/2.14193$      |                 | RETM2:1                                          | 0.008616*y          |
| 6       | N <sub>2222</sub> L            | 50    | $(4*0.47317*x*1000/219.33+1-(8*1000/219.33*0.47317*x+1)^{0.5})/(8*0.47317*x)+x/3.79577$    |                 | RETM2:1                                          | 0.006434*y          |
| 7       | EmimTFA                        | 50    | 0.3046*x                                                                                   |                 | Linear fitting                                   | 0.01840*y           |
| 8       | HmimCl                         | 50    | $(4*0.04574*x*1000/202.73+1-(8*1000/202.73*0.04574*x+1)^{0.5})/(8*0.04574*x)+x/1.36987$    |                 | RETM2:1                                          | 0.01049*y           |
| 9       | [DBUH]Im                       | 50    | $(1000/220.32)*428.16952*x/(428.16952*x+1)+x/1.19091$                                      |                 | RETM1:1                                          | N.A. <sup>[b]</sup> |
| 10      | EmimAc                         | 30    | $(4*13.28577*x*1000/170.21+1-(8*1000/170.21*13.28577*x+1)^{0.5})/(8*13.28577*x)+x/0.52415$ |                 | RETM2:1                                          | 0.01181*y           |
| 11      | EmimAc                         | 70    | $(4*1.53881*x*1000/170.21+1-(8*1000/170.21*1.53881*x+1)^{0.5})/(8*1.53881*x)+x/1.56622$    |                 | RETM2:1                                          | 0.01065*y           |
| 12      | EmimAc+5 wt% H <sub>2</sub> O  | 50    | $(4*1.12189*x*1000/170.21+1-(8*1000/170.21*1.12189*x+1)^{0.5})/(8*1.12189*x)+x/1.73996$    |                 | RETM2:1                                          | 0.01065*y           |
| 13      | EmimAc+10 wt% H <sub>2</sub> O | 50    | $(4*0.59185*x*1000/170.21+1-(8*1000/170.21*0.59185*x+1)^{0.5})/(8*0.59185*x)+x/3.10183$    |                 | RETM2:1                                          | 0.01024*y           |

[a] The units of the solubility data are in terms of mol/kg.

[b]The solubility of O<sub>2</sub> in [DBUH]Im could not be measured.

**Table S4.** Results of H<sub>2</sub>S oxidation reactions in different ILs<sup>[a]</sup>.

| Entries | Solvents                        | T (°C) | H <sub>2</sub> S:O <sub>2</sub> (mmol) | Conversion rate of H <sub>2</sub> S (%) <sup>[b]</sup> | Sulfur recovery rate (%) |
|---------|---------------------------------|--------|----------------------------------------|--------------------------------------------------------|--------------------------|
| 1       | H <sub>2</sub> O <sup>[c]</sup> | 50     | 6:3                                    | 5.6                                                    | 4.4                      |
| 2       | EmimAc                          | 50     | 6:3                                    | 96.1                                                   | 94.3                     |
| 3       | BmimAc                          | 50     | 6:3                                    | 95.8                                                   | 92.5                     |
| 4       | HmimAc                          | 50     | 6:3                                    | 95.6                                                   | 93.2                     |
| 5       | N <sub>2222</sub> Ac            | 50     | 6:3                                    | 83.7                                                   | 81.5                     |
| 6       | N <sub>2222</sub> L             | 50     | 6:3                                    | 71.9                                                   | 70.2                     |
| 7       | EmimTFA                         | 50     | 6:3                                    | 19.9                                                   | 18                       |
| 8       | HmimCl                          | 50     | 6:3                                    | 12.1                                                   | 11.5                     |
| 9       | HmimTf <sub>2</sub> N           | 50     | 6:3                                    | N.D. <sup>[d]</sup>                                    | N.D.                     |
| 10      | HmimPF <sub>6</sub>             | 50     | 6:3                                    | N.D.                                                   | N.D.                     |
| 11      | HmimBF <sub>4</sub>             | 50     | 6:3                                    | N.D.                                                   | N.D.                     |
| 12      | [DBUH]Im                        | 50     | 6:3                                    | 46.4 <sup>[e]</sup>                                    | N.D.                     |
| 13      | EmimAc <sup>[f]</sup>           | 50     | 6:3                                    | 84.7                                                   | 80.1                     |
| 14      | EmimAc <sup>[g]</sup>           | 50     | 6:3                                    | 97.2                                                   | 94.9                     |
| 15      | EmimAc                          | 50     | 6:2                                    | 61.0                                                   | 57.4                     |
| 16      | EmimAc                          | 50     | 6:4.5                                  | 97.9                                                   | 95.2                     |
| 17      | EmimAc                          | 30     | 6:3                                    | 62.7                                                   | 60.5                     |
| 18      | EmimAc                          | 70     | 6:3                                    | 93.8                                                   | 88.7                     |
| 19      | EmimAc+5wt%H <sub>2</sub> O     | 50     | 6:3                                    | 81.5                                                   | 78.9                     |
| 20      | EmimAc+10wt%H <sub>2</sub> O    | 50     | 6:3                                    | 65.8                                                   | 63.1                     |

[a] Reaction conditions: The amount of IL used was 6 mmol. The quantities of H<sub>2</sub>S and O<sub>2</sub> introduced into the reactor were 6 mmol and 3 mmol, respectively, with a reaction duration of 3 h at 50°C.

[b] The H<sub>2</sub>S conversion rate was calculated by dividing the amount of H<sub>2</sub>S consumed during the reaction by the initial total amount of H<sub>2</sub>S introduced.

[c] The mass of H<sub>2</sub>O used in the reaction system was 1.0 g.

[d] N.D.: No elemental sulfur was observed to form following the completion of the reaction.

[e] Since the solubility of O<sub>2</sub> in [DBUH]Im was not determined, only the solubility of H<sub>2</sub>S therein was considered when calculating the H<sub>2</sub>S conversion rate.

[f] The amount of EmimAc used in the reaction system was 3 mmol.

[g] The amount of EmimAc used in the reaction system was 9 mmol.

**Table S5.** Cartesian coordinates of EmimAc+H<sub>2</sub>S complex from Gaussian 16 program.

| Atoms | Coordinates (Angstroms) |           |           |
|-------|-------------------------|-----------|-----------|
|       | X                       | Y         | Z         |
| O     | 2.2639                  | -1.448547 | -0.031558 |
| C     | 1.333616                | -1.444899 | -0.873495 |
| C     | 0.731026                | -2.787863 | -1.287115 |
| O     | 0.858928                | -0.414185 | -1.445947 |
| H     | 0.773585                | -3.510764 | -0.470015 |
| H     | -0.299157               | -2.67893  | -1.630637 |
| H     | 1.318809                | -3.193825 | -2.118107 |
| C     | -0.880477               | 0.92378   | 1.048649  |
| N     | -1.912172               | 0.30857   | 0.465203  |
| C     | -1.85489                | -1.038889 | 0.771412  |
| C     | -0.765564               | -1.219837 | 1.565788  |
| N     | -0.175432               | 0.019239  | 1.729902  |
| C     | -2.903548               | 0.946648  | -0.417037 |
| C     | -2.616822               | 0.673993  | -1.885243 |
| C     | 1.065595                | 0.275799  | 2.458661  |
| H     | -0.643339               | 1.97011   | 0.967689  |
| H     | -2.587053               | -1.735937 | 0.400768  |
| H     | -0.356286               | -2.104635 | 2.022262  |
| H     | -3.88222                | 0.56571   | -0.123397 |
| H     | -2.879659               | 2.01391   | -0.198524 |
| H     | -3.391095               | 1.145461  | -2.495631 |
| H     | -1.64799                | 1.08038   | -2.180215 |
| H     | -2.619428               | -0.397307 | -2.098068 |
| H     | 1.89138                 | -0.163843 | 1.90099   |
| H     | 1.200764                | 1.350171  | 2.553919  |
| H     | 0.994572                | -0.171289 | 3.449322  |
| S     | 2.042399                | 2.346084  | -0.691259 |
| H     | 2.881813                | 1.864735  | 0.250803  |
| H     | 1.543908                | 1.063508  | -1.006417 |

**Table S6.** Cartesian coordinates of H<sub>2</sub>O+H<sub>2</sub>S complex from Gaussian 16 program.

| Atoms | Coordinates (Angstroms) |           |           |
|-------|-------------------------|-----------|-----------|
|       | X                       | Y         | Z         |
| O     | 2.246512                | 0.11336   | 0.040481  |
| H     | 1.285168                | -0.015699 | -0.007746 |
| H     | 2.640792                | -0.72118  | -0.242346 |
| S     | -1.191494               | -0.096355 | -0.0533   |
| H     | -1.423069               | 1.169149  | -0.467151 |
| H     | -1.411086               | 0.202528  | 1.246193  |

**Table S7.** Cartesian coordinates of EmimAc+O<sub>2</sub> complex from Gaussian 16 program.

| Atoms | Coordinates (Angstroms) |           |           |
|-------|-------------------------|-----------|-----------|
|       | X                       | Y         | Z         |
| O     | -2.732999               | 1.671736  | -0.04783  |
| C     | -1.592692               | 1.683371  | 0.495116  |
| C     | -1.539298               | 1.437386  | 2.009496  |
| O     | -0.498364               | 1.909057  | -0.089315 |
| H     | -2.345243               | 0.778902  | 2.339907  |
| H     | -0.577633               | 1.02247   | 2.316494  |
| H     | -1.666353               | 2.396966  | 2.523988  |
| C     | 0.168647                | -1.073967 | -0.976628 |
| N     | 0.515041                | -1.545684 | 0.223569  |
| C     | -0.634018               | -1.904837 | 0.905497  |
| C     | -1.683071               | -1.644076 | 0.079602  |
| N     | -1.158019               | -1.132934 | -1.092264 |
| C     | 1.88583                 | -1.604648 | 0.756671  |
| C     | 2.126544                | -0.541431 | 1.816782  |
| C     | -1.937086               | -0.635936 | -2.225153 |
| H     | 0.846853                | -0.694103 | -1.720538 |
| H     | -0.599664               | -2.307542 | 1.903364  |
| H     | -2.743912               | -1.766426 | 0.216822  |
| H     | 2.03398                 | -2.608569 | 1.156617  |
| H     | 2.556723                | -1.481707 | -0.092416 |
| H     | 3.16584                 | -0.595564 | 2.150157  |
| H     | 1.94041                 | 0.458584  | 1.422148  |
| H     | 1.484668                | -0.69592  | 2.686925  |
| H     | -2.46727                | 0.262272  | -1.909858 |
| H     | -1.256578               | -0.401589 | -3.040568 |
| H     | -2.638328               | -1.406421 | -2.54279  |
| O     | 3.135909                | 1.959944  | -0.824815 |
| O     | 3.345231                | 0.895989  | -1.350251 |

**Table S8.** Cartesian coordinates of H<sub>2</sub>O+O<sub>2</sub> complex from Gaussian 16 program.

| Atoms | Coordinates (Angstroms) |           |           |
|-------|-------------------------|-----------|-----------|
|       | X                       | Y         | Z         |
| O     | -2.507345               | -0.120294 | -0.000163 |
| H     | -1.553002               | -0.266685 | 0.001931  |
| H     | -2.623439               | 0.838241  | -0.00532  |
| O     | 2.102675                | -0.105254 | -0.001974 |
| O     | 0.926725                | 0.154103  | 0.00256   |

## 5. References

1. M. O. M. W. Lemmon, D.G. Friend, NIST ChemistryWebBook, NIST Standard Reference Database Number 69, National Institute of Standards and Technology, Gaithersburg MD, 2018.
2. X. M. Zhang, W. J. Xiong, L. L. Peng, Y. T. Wu and X. B. Hu, *AIChE J.*, 2020, **66**, e16936.
